# Supplementary material for: Whole Genome Analysis of African G12P[6] and G12P[8] Rotaviruses Provides Evidence of Porcine-Human Reassortment at NSP2, NSP3, and NSP4
Source: Front Microbiol. 2021 Jan 12;11:604444. doi: 10.3389/fmicb.2020.604444 (PMC7835662; doi:10.3389/fmicb.2020.604444)
Supplement: Supplementary file 7 [file Table_1.XLSX]

## Sheet: Sheet1
MRC-DPRU ID	Country	Strain	VP7	VP4	VP6	VP1	VP2	VP3	NSP1	NSP2	NSP3	NSP4	NSP5
MRC-DPRU1656	ZAF	G12P[6]	KP752687.1	KP752685.1	KP752686.1	KP752682.1	KP752683.1	KP752684.1	KP752677.1	KP752678.1	KP752679.1	KP752680.1	KP752681.1
MRC-DPRU3491	ZMB	G12P[6]	KF636151.1	KF636149.1	KF636150.1	KF636146.1	KF636147.1	KF636148.1	KF636141.1	KF636142.1	KF636143.1	KF636144.1	KF636145.1
MRC-DPRU3713	UGA	G12P[6]	KJ751872.1	KJ751870.1	KJ751871.1	KJ751867.1	KJ751868.1	KJ751869.1	KJ751862.1	KJ751863.1	KJ751864.1	KJ751865.1	KJ751866.1
MRC-DPRU2130	ZAF	G12P[6]	KJ751998.1	KJ751996.1	KJ751997.1	KJ751993.1	KJ751994.1	KJ751995.1	KJ751988.1	KJ751989.1	KJ751990.1	KJ751991.1	KJ751992.1
MRC-DPRU1680	ZMB	G12P[6]	KJ752535.1	KJ752533.1	KJ752534.1	KJ752530.1	KJ752531.1	KJ752532.1	KJ752525.1	KJ752526.1	KJ752527.1	KJ752528.1	KJ752529.1
MRC-DPRU3507	ZMB	G12P[6]	KJ751883.1	KJ751881.1	KJ751882.1	KJ751878.1	KJ751879.1	KJ751880.1	KJ751873.1	KJ751874.1	KJ751875.1	KJ751876.1	KJ751877.1
MRC-DPRU4090	ZAF	G12P[6]	KJ752819.1	KJ752817.1	KJ752818.1	KJ752814.1	KJ752815.1	KJ752816.1	KJ752809.1	KJ752810.1	KJ752811.1	KJ752812.1	KJ752813.1
MRC-DPRU861	ETH	G12P[6]	KJ753395.1	KJ753393.1	KJ753394.1	KJ753390.1	KJ753391.1	KJ753392.1	KJ753385.1	KJ753386.1	KJ753387.1	KJ753388.1	KJ753389.1
MRC-DPRU1794	ZWE	G12P[6]	KJ752917.1	KJ752915.1	KJ752916.1	KJ752912.1	KJ752913.1	KJ752914.1	KJ752907.1	KJ752908.1	KJ752909.1	KJ752910.1	KJ752911.1
MRC-DPRU1370	ZAF	G12P[6]	KP752939.1	KP752937.1	KP752938.1	KP752934.1	KP752935.1	KP752936.1	KP752929.1	KP752930.1	KP752931.1	KP752932.1	KP752933.1
MRC-DPRU4578	TGO	G12P[6]	KP752950.1	KP752948.1	KP752949.1	KP752945.1	KP752946.1	KP752947.1	KP752940.1	KP752941.1	KP752942.1	KP752943.1	KP752944.1
MRC-DPRU1660	ZMB	G12P[6]	KP752871.1	KP752869.1	KP752870.1	KP752866.1	KP752867.1	KP752868.1	KP752861.1	KP752862.1	KP752863.1	KP752864.1	KP752865.1
MRC-DPRU4970	ETH	G12P[8]	KP752795.1	KP752793.1	KP752794.1	KP752792.1	KP752791.1	KP752792.1	KP752785.1	KP752786.1	KP752787.1	KP752788.1	KP752789.1
MRC-DPRU1191	ZAF	G12P[8]	KJ752344.1	KJ752342.1	KJ752343.1	KJ752339.1	KJ752340.1	KJ752341.1	KJ752334.1	KJ752335.1	KJ752336.1	KJ752337.1	KJ752338.1
MRC-DPRU5166	ZAF	G12P[8]	KJ751784.1	KJ751782.1	KJ751783.1	KJ751779.1	KJ751780.1	KJ751781.1	KJ751774.1	KJ751775.1	KJ751776.1	KJ751777.1	KJ751778.1
MRC-DPRU5171	TGO	G12P[8]	KJ752601.1	KJ752599.1	KJ752600.1	KJ752596.1	KJ752597.1	KJ752598.1	KJ752591.1	KJ752592.1	KJ752593.1	KJ752594.1	KJ752595.1
MRC-DPRU5144	TGO	G12P[8]	KJ751596.1	KJ751594.1	KJ751595.1	KJ751591.1	KJ751592.1	KJ751593.1	KJ751586.1	KJ751587.1	KJ751588.1	KJ751589.1	KJ751590.1
MRC-DPRU5010	ETH	G12P[8]	KJ752634.1	KJ752632.1	KJ752633.1	KJ752629.1	KJ752630.1	KJ752631.1	KJ752624.1	KJ752625.1	KJ752626.1	KJ752627.1	KJ752628.1
MRC-DPRU5002	ETH	G12P[8]	KJ752009.1	KJ752007.1	KJ752008.1	KJ752004.1	KJ752005.1	KJ752006.1	KJ751999.1	KJ752000.1	KJ752001.1	KJ752002.1	KJ752003.1
MRC-DPRU2140	ZAF	G12P[8]	KJ753599.1	KJ753597.1	KJ753598.1	KJ753593.1	KJ753594.1	KJ753596.1	KJ753588.1	KJ753589.1	KJ753590.1	KJ753591.1	KJ753592.1
MRC-DPRU108	ZAF	G12P[8]	KJ753340.1	KJ753338.1	KJ753339.1	KJ753335.1	KJ753336.1	KJ753337.1	KJ753330.1	KJ753331.1	KJ753332.1	KJ753333.1	KJ753334.1
MRC-DPRU123	ZAF	G12P[8]	KJ752952.1	KJ752950.1	KJ752951.1	KJ752947.1	KJ752948.1	KJ752949.1	KJ752942.1	KJ752943.1	KJ752944.1	KJ752945.1	KJ752946.1
MRC-DPRU138	ZAF	G12P[8]	KJ753024.1	KJ753022.1	KJ753023.1	KJ753019.1	KJ753020.1	KJ753021.1	KJ753014.1	KJ753015.1	KJ753016.1	KJ753017.1	KJ753018.1
MRC-DPRU309	ZAF	G12P[8]	KJ753554.1	KJ753552.1	KJ753553.1	KJ753548.1	KJ753549.1	KJ753551.1	KJ753540.1	KJ753542.1	KJ753544.1	KJ753545.1	KJ753547.1
MRC-DPRU1554	ZAF	G12P[8]	KJ753697.1	KJ753695.1	KJ753696.1	KJ753692.1	KJ753693.1	KJ753694.1	KJ753687.1	KJ753688.1	KJ753689.1	KJ753690.1	KJ753691.1
MRC-DPRU850	ETH	G12P[8]	KJ753351.1	KJ753349.1	KJ753350.1	KJ753346.1	KJ753347.1	KJ753348.1	KJ753341.1	KJ753342.1	KJ753343.1	KJ753344.1	KJ753345.1
MRC-DPRU3043	CMR	G12P[8]	KJ753076.1	KJ753074.1	KJ753075.1	KJ753071.1	KJ753072.1	KJ753073.1	KJ753066.1	KJ753067.1	KJ753068.1	KJ753069.1	KJ753070.1
MRC-DPRU1148	ZAF	G12P[8]	KP752543.1	KP752542.1	KP752542.1	KP752538.1	KP752539.1	KP752540.1	KP752533.1	KP752534.1	KP752535.1	KP752536.1	KP752537.1
MRC-DPRU76	ZAF	G12P[8]	KP753161.1	KP753159.1	KP753160.1	KP753156.1	KP753157.1	KP753158.1	KP753151.1	KP753152.1	KP753153.1	KP753154.1	KP753155.1
MRC-DPRU75	ZAF	G12P[8]	KJ752366.1	KJ752364.1	KJ752365.1	KJ752361.1	KJ752362.1	KJ752363.1	KJ752356.1	KJ752357.1	KJ752358.1	KJ752359.1	KJ752360.1
MRC-DPRU71	ZAF	G12P[8]	KP753251.1	KP753249.1	KP753250.1	KP753246.1	KP753247.1	KP753248.1	KP753241.1	KP753242.1	KP753243.1	KP753244.1	KP753245.1
MRC-DPRU1858	ZWE	G12P[8]	KP753228.1	KP753226.1	KP753227.1	KP753223.1	KP753224.1	KP753225.1	KP753218.1	KP753219.1	KP753220.1	KP753221.1	KP753222.1

## Sheet: Sheet2
MRC-DPRU ID	Country	Age	Gender	Collection date
MRC-DPRU1656	South Africa	6m	Male	2007-06-13
MRC-DPRU3491	Zambia	2months	Male	2009-09-08
MRC-DPRU3713	Uganda			2010
MRC-DPRU2130	South Africa	6m	Female	2005-09-25
MRC-DPRU1680	Zambia	8months	Male	2008-10-19
MRC-DPRU3507	Zambia	3 months	Male	2009-11-21
MRC-DPRU4090	South Africa	1 day	Male	2011-07-15
MRC-DPRU861	Ethopia	8 months	Male	2013-03-20
MRC-DPRU1794	Zimbwabwe	12 months	Male	2009-06-02
MRC-DPRU1370	South Africa	4 months	Female	2004-08-17
MRC-DPRU4578	Togo	15 months	Male	2010-10-15
MRC-DPRU1660	Zambia	3 months	Male	2008-08-03
MRC-DPRU4970	Ethopia	12 months	Male	2010-09-14
MRC-DPRU1191	South Africa	8 months	Male	2009-06-02
MRC-DPRU5166	South Africa
MRC-DPRU5171	Togo	6months	Female	2010-12-01
MRC-DPRU5144	Togo	4months	Male	2010-09-01
MRC-DPRU5010	Ethopia	8months	Male	2010-10-18
MRC-DPRU5002	Ethopia	12months	Male	2010-09-22
MRC-DPRU2140	South Africa	10m	Female	2005-09-27
MRC-DPRU108	South Africa	8months	Male	2009-04-15
MRC-DPRU123	South Africa	14months	Female	2009-05-04
MRC-DPRU138	South Africa	5months	Male	2009-05-07
MRC-DPRU309	South Africa	7months	Female	2010-04-14
MRC-DPRU1554	South Africa	4months	Male	2010-07-30
MRC-DPRU850	Ethopia	9months	Female	2012-11-29
MRC-DPRU3043	Cameroon			2009
MRC-DPRU1148	South Africa	1 month	Female	2009-05-22
MRC-DPRU76	South Africa	7months	Male	2012-06-01
MRC-DPRU75	South Africa	32months	Female	2012-05-25
MRC-DPRU71	South Africa	14months	Male	2012-05-17
MRC-DPRU1858	Zimbabwe	9months	Female	1905-07-03
